# Supplementary material for: Electrospun nanofibers with surface oriented lamellar patterns and their potential applications
Source: Royal Society of Chemistry journal article supplement (doi:10.1039/d0nr02641g), 2020-01-01
Supplement: d0nr02641g1.pdf [file d0nr02641g1.pdf]

## Supplementary information

### Electrospun Nanofibers with Surface Oriented Lamellar Pattern and Potential Applications

O. Elishav<sup>a</sup>, Y. Shener<sup>b</sup>, V. Beilin<sup>b</sup>, G. E. Shter<sup>b</sup>, B. Ng<sup>c</sup>, W.E. Mustain<sup>c</sup>, Miron V. Landau<sup>d</sup>, Moti Herskowitz<sup>d</sup>, G. S. Grader<sup>a,b\*</sup>

<sup>a</sup> The Nancy and Stephen Grand Technion Energy Program, Technion – Israel Institute of Technology, Haifa 3200003, Israel

<sup>b</sup> The Wolfson Department of Chemical Engineering, Technion – Israel Institute of Technology, Haifa 3200003, Israel

<sup>c</sup> Department of Chemical Engineering, Swearingen Engineering Center, University of South Carolina, Columbia, SC 29208, United States

<sup>d</sup> Chemical Engineering Department, Blechner Center for Industrial Catalysis and Process Development, Ben-Gurion University of the Negev, Beer-Sheva, 84105, Israel..

\*Corresponding author: e-mail [garder@technion.ac.il](mailto:garder@technion.ac.il)

Electrospinning process details:

The electrospinning duration was 2 to 4 hours. The working distance was 14 cm, while the applied voltage was -3kV on the collector and 18-22 kV on the needle. The relative humidity inside the electrospinning enclosure was fixed in the range of 30-40%, using flowing nitrogen through a bubbler. At acetylacetonate/PVP weight ratio larger than 1.0, the needle voltage was 18 kV to ensure the nanofibers' drying before reaching the collector.

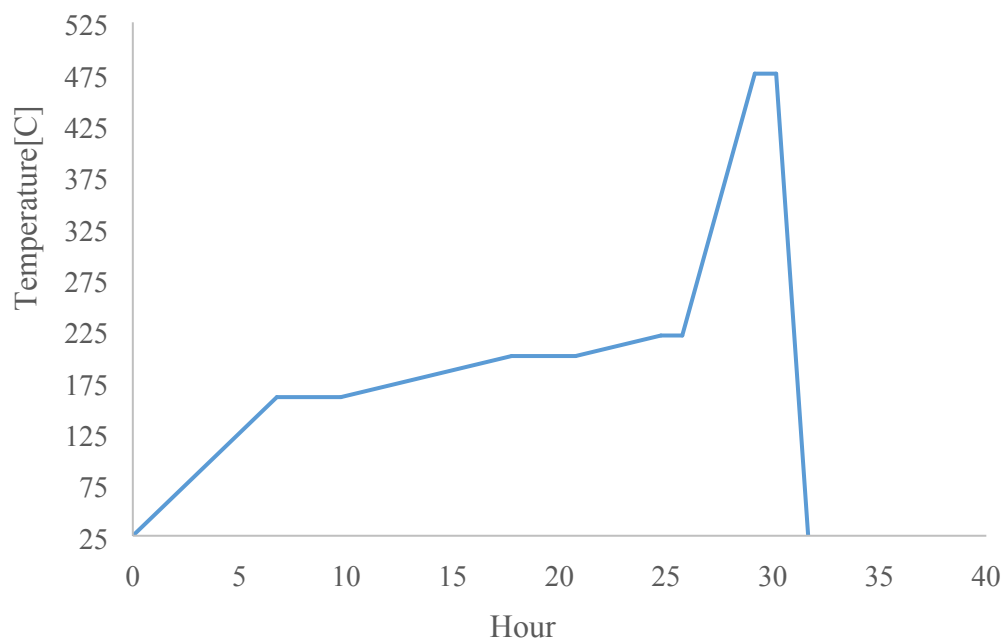

**Figure S1.** Thermal treatment heating profile.

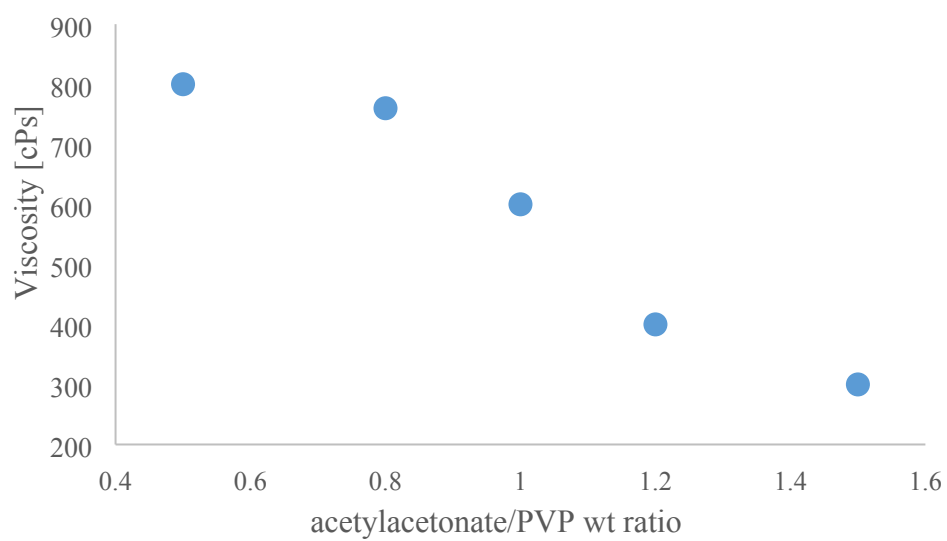

**Figure S2.** Precursor solutions' viscosity as a function of acac/PVP weight ratio

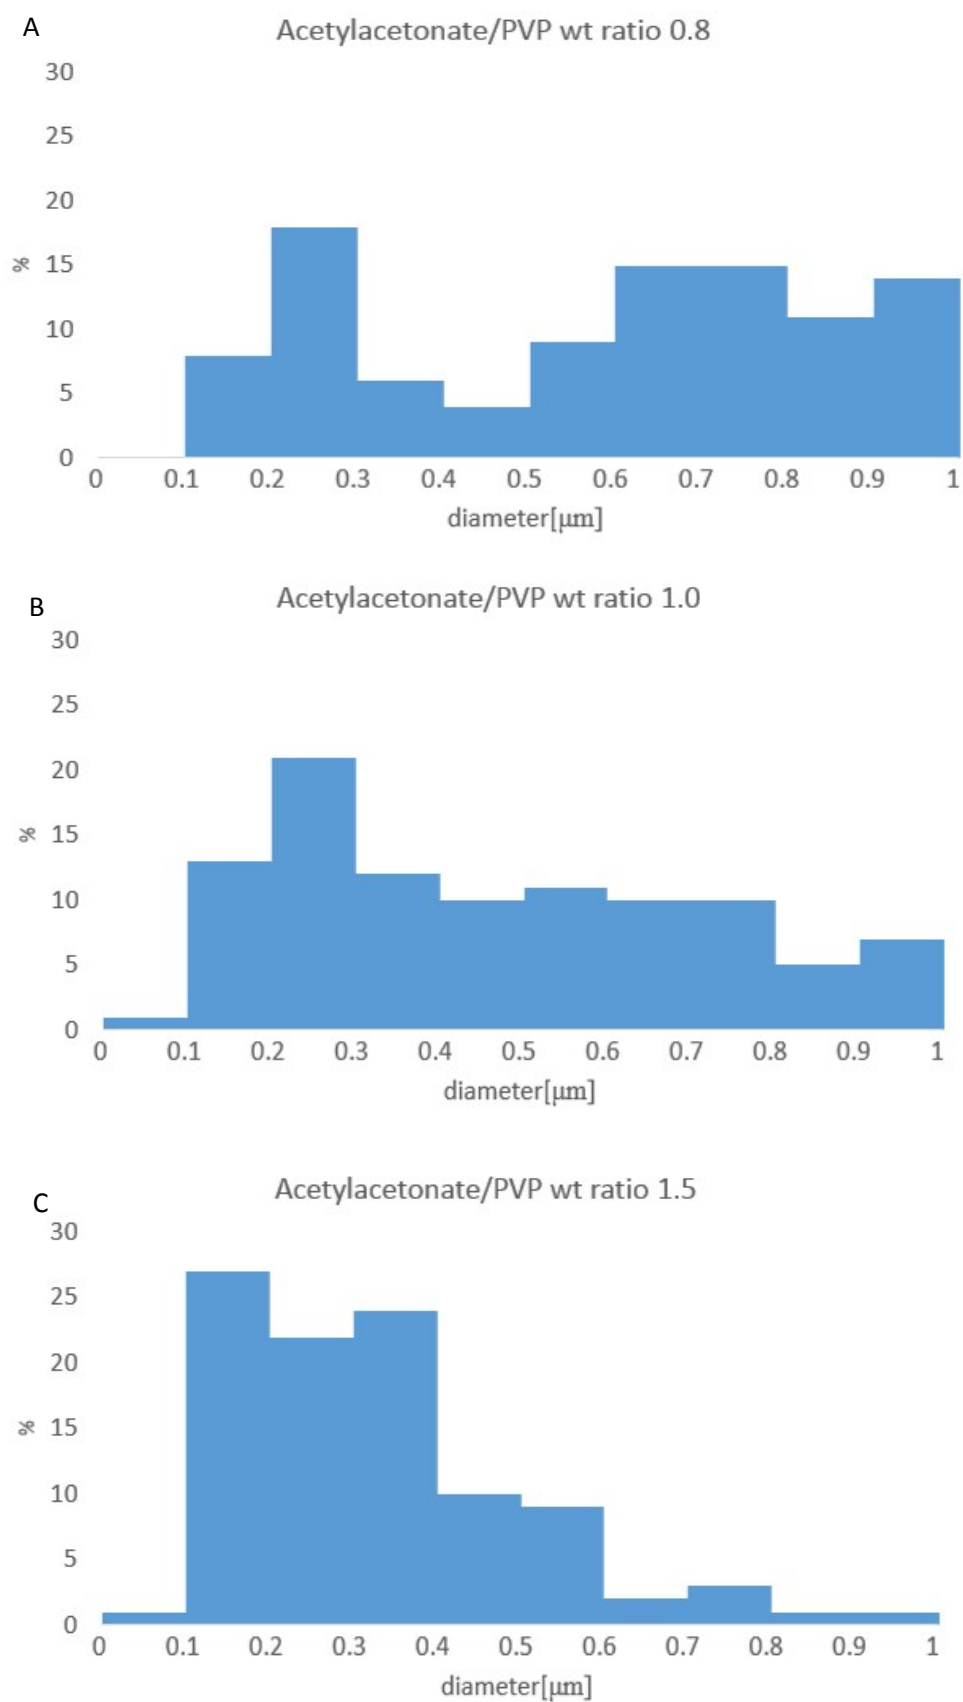

**Figure S3.** Nanofibers' diameters distribution before thermal treatment at different acac/PVP ratio: a) 0.8. b) 1.0 c) 1.5

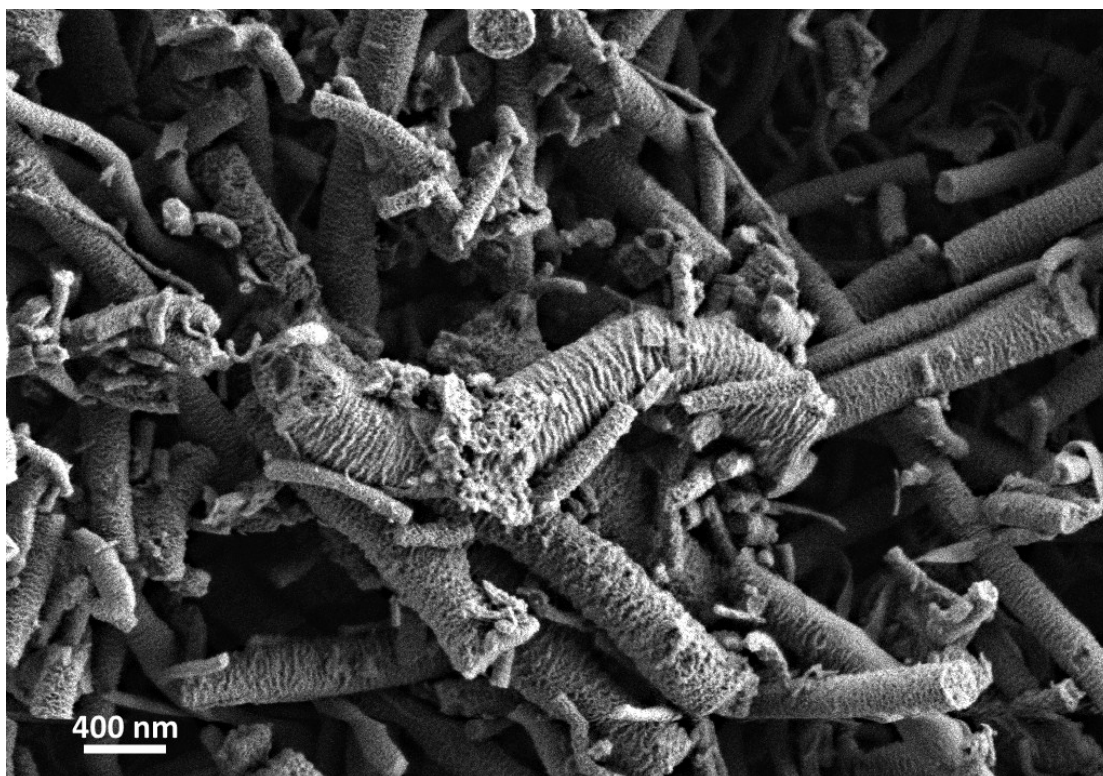

**Figure S4.** Nanofibers after thermal treatment in inert atmosphere up to 220°C and in air from 220°C to 475°C.

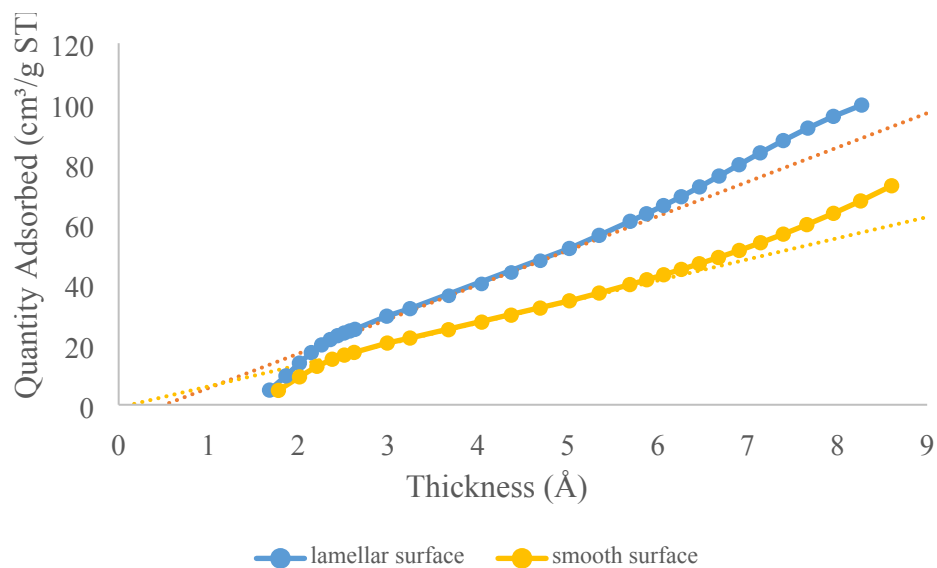

**Figure S5.** t-plot comparison between lamellar and smooth surface Fe-Al-O nanofibers.

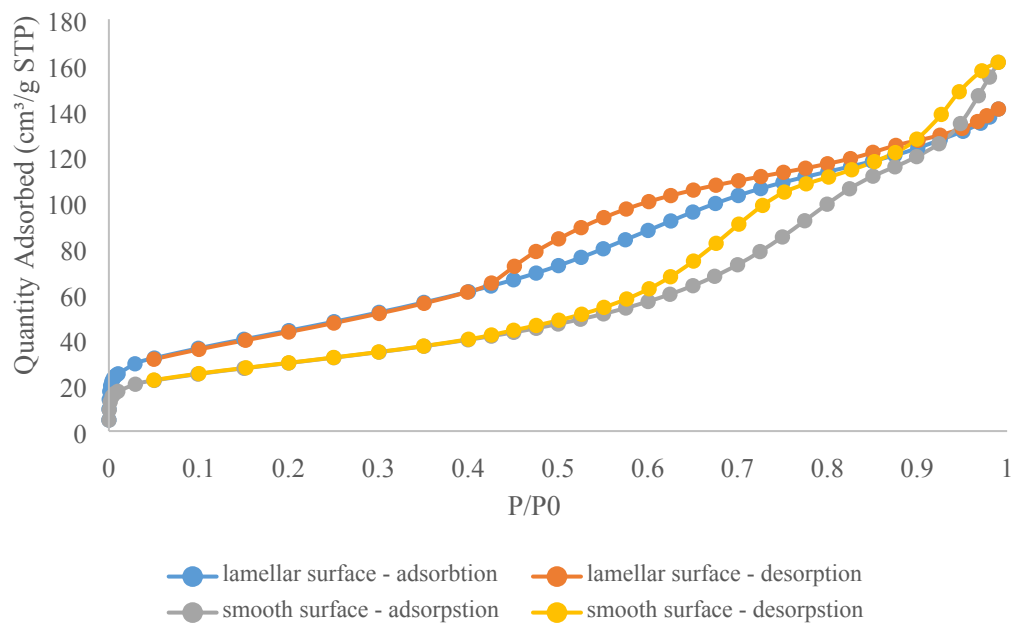

**Figure S6.** Isotherm linear plot of smooth and lamellar surface nanofibers

**Table S1.** Precursor composition for electrospun nanofiber (all values are in % wt.)

| Material                           | Al-O | Ni-O | Fe-O | Ti-Al-O | Ni-Al-O | Ti-Fe-O |
|------------------------------------|------|------|------|---------|---------|---------|
| PVP                                | 9    | 16   | 14   | 9       | 16      | 8       |
| M <sub>1</sub> (acac) <sub>x</sub> | 14   | 24   | 20   | 0       | 18      | 0       |
| M <sub>2</sub> (acac) <sub>x</sub> | 0    | 0    | 0    | 4       | 6       | 4       |
| TTIP                               | 0    | 0    | 0    | 9       | 0       | 9       |
| AcAc                               | 0    | 0    | 0    | 6       | 0       | 6       |
| Acetic acid                        | 55   | 0    | 47   | 52      | 0       | 52      |
| Ethanol                            | 22   | 0    | 19   | 20      | 0       | 21      |
| DMF                                | 0    | 60   | 0    | 0       | 60      | 0       |

M<sub>y</sub>(acac)<sub>x</sub>- metal acetylacetonate complex

TTIP- Titanium isopropoxide

AcAc- Acetyl acetate

DMF- Dimethylformamide
